# Supplementary material for: Perceived Stress and its Epidemiological and Behavioral Correlates in an Urban Area of Delhi, India: A Community-Based Cross-Sectional Study
Source: PubMed Central journal article supplement — Indian J Psychol Med. 2020 Jan 6;42(1):80–6. doi: 10.4103/IJPSYM.IJPSYM_528_18 (PMC6970302; doi:10.4103/ijpsym.ijpsym_528_18), 2020-01-06
Supplement: IJPsyM-42-80_Suppl1.pdf [file IJPsyM-42-80_Suppl1.pdf]

## ONLINE SUPPLEMENTARY MATERIAL

### Hindi translation of the Perceived Stress Scale – 10 item

इस सूचकांक के सभी प्रश्न इस बात से सम्बंधित हैं कि पिछले माह इस प्रकार के विचार तथा भावनाएं आप में कितनी बार उत्पन्न हुए

कृपया प्रत्येक परिस्थिति में गोला लगाके उचित उत्तर निर्देशित करें

नाम

तिथि

आयु

लिंग 1. पुरुष 2. स्त्री

**0 कभी नहीं 1 लगभग नहीं के बराबर 2 कभी कभी 3 कई बार 4 अनेक बार**

1. पिछले माह कितनी बार आप के साथ कुछ अप्रत्याशित घटना घट जाने से आप परेशान हुए?
2. पिछले माह, आपको कितनी बार लगा कि जीवन की आवश्यक चीज़ों को आप नियंत्रित नहीं कर पाएं?
3. पिछले माह, आपने कितनी बार घबराहट तथा तनाव महसूस किया?
4. पिछले माह, कितनी बार आप अपनी व्यक्तिगत समस्याओं से सामना करने के लिए आत्मविश्वास पूर्ण लगा?
5. पिछले माह, कितनी बार आपको लगा कि चीज़ें आप के पक्ष में जा रही हैं?
6. पिछले माह, कितनी बार आपने यह पाया कि जो सारी चीज़ें आपको करनी पड़ रही है, उन्हें आप निपटा नहीं पा रहे हैं?
7. पिछले माह, कितनी बार आपको लगा कि आप अपने जीवन में चिढ़चिढ़ाहट को काबू कर पाए?
8. पिछले माह, आपको कितनी बार लगा कि सभी चीज़ें आप के नियंत्रण में हैं?
9. पिछले माह, कितनी बार आपको इस बात पर गुस्सा आया कि चीज़ें आपके नियंत्रण के बाहर हैं?
10. पिछले माह, कितनी बार आपको लगा कि मुसीबतों का अम्बार लगता जा रहा है, जिस पर आप जीत प्राप्त नहीं कर सकते हैं?
